# Supplementary material for: NMR 1H,19F-based screening of the four stem-looped structure 5_SL1–SL4 located in the 5′-untranslated region of SARS-CoV 2 RNA
Source: Royal Society of Chemistry journal article supplement (doi:10.1039/d3md00322a), 2023-11-28
Supplement: d3md00322a1.pdf [file d3md00322a1.pdf]

Electronic Supplementary Material (ESI) for RSC Medicinal Chemistry.

## NMR $^1\text{H}$ , $^{19}\text{F}$ -based screening of the four stem-looped structure 5\_SL1-SL4 located in the 5'-untranslated region of SARS-CoV 2 RNA

Daniel Hyman<sup>1</sup>, Jason Martins<sup>1</sup>, Christian Richter<sup>1</sup>, Sridhar Sreeramulu<sup>1</sup>, Anna Wacker<sup>1</sup>, Jan Ferner<sup>1</sup>, Neeraj N. Patwardhan<sup>2</sup>, Amanda E. Hargrove<sup>2</sup>, Harald Schwalbe<sup>1,\*</sup>

<sup>1</sup>Institute for Organic Chemistry and Chemical Biology, Center for Biomolecular Magnetic Resonance (BMRZ), Goethe-University Frankfurt, Max-von-Laue-Str. 7, 60438 Frankfurt/Main, Germany.

<sup>2</sup>Department of Chemistry, Duke University, Durham, North Carolina 27708, USA

**Table 1 SI: CSP values and  $T_2$  reduction quotients of all RNA binders from the DRTL-F library.**

|                            | compound | 5_SL1234         |                     |                          | 5_SL1            |                     |                          | 5_SL2+3 <sup>ext</sup> |                     |                          | 5_SL4            |                     |                          |
|----------------------------|----------|------------------|---------------------|--------------------------|------------------|---------------------|--------------------------|------------------------|---------------------|--------------------------|------------------|---------------------|--------------------------|
|                            |          | $^1\text{H}$ CSP | $^{19}\text{F}$ CSP | $^{19}\text{F}$ $T_2$ Q. | $^1\text{H}$ CSP | $^{19}\text{F}$ CSP | $^{19}\text{F}$ $T_2$ Q. | $^1\text{H}$ CSP       | $^{19}\text{F}$ CSP | $^{19}\text{F}$ $T_2$ Q. | $^1\text{H}$ CSP | $^{19}\text{F}$ CSP | $^{19}\text{F}$ $T_2$ Q. |
| strong binders to 5_SL1234 | DRTLA04  | 14               | 17                  | 78                       | 2.6              | 10                  | 0                        | 8                      | 24                  | 100                      | 3                | 13                  | 17                       |
|                            | DRTL B04 | 13               | 27                  | 96                       | 0                | 11                  | 78                       | 2.7                    | 17                  | 100                      | 3                | 7                   | 92                       |
|                            | DRTL D04 | 26               | 6.5                 | 100                      | 1                | 2                   | 2                        | 0.7                    | 0                   | 39                       | 2                | 2                   | 48                       |
|                            | DRTLA05  | 20               | 1.6                 | 100                      | 2                | 7                   | 20                       | 1.8                    | 7                   | 43                       | 0.8              | 6                   | 11                       |
|                            | D02      | 12               | 11.5                | 100                      |                  |                     |                          |                        |                     |                          |                  |                     |                          |
| medium binders to 5_SL1234 | E05      | 5                | 18                  | 100                      |                  |                     |                          |                        |                     |                          |                  |                     |                          |
|                            | G10      | 3.6              | 0.4                 | 40                       |                  |                     |                          |                        |                     |                          |                  |                     |                          |
| weak binders to 5_SL1234   | DRTL C01 | 14               | 1.5                 | 59                       |                  |                     |                          |                        |                     |                          |                  |                     |                          |
|                            | DRTL E02 | 5                | 4.2                 | 100                      |                  |                     |                          |                        |                     |                          |                  |                     |                          |
|                            | DRTL F02 | 0                | 8                   | 2                        |                  |                     |                          |                        |                     |                          |                  |                     |                          |

**Table 2 SI: CSP, LOGSY factor and  $T_2$  reduction quotients of the 5\_SL1234 binders from the DSI library**

|                        | Ligand 1         |              |                       | Ligand 2         |              |                       | Ligand 3         |              |                       | Ligand 4         |              |                       | Ligand 5         |              |                       |
|------------------------|------------------|--------------|-----------------------|------------------|--------------|-----------------------|------------------|--------------|-----------------------|------------------|--------------|-----------------------|------------------|--------------|-----------------------|
|                        | $^1\text{H}$ CSP | LOGSY factor | $^1\text{H}$ $T_2$ Q. | $^1\text{H}$ CSP | LOGSY factor | $^1\text{H}$ $T_2$ Q. | $^1\text{H}$ CSP | LOGSY factor | $^1\text{H}$ $T_2$ Q. | $^1\text{H}$ CSP | LOGSY factor | $^1\text{H}$ $T_2$ Q. | $^1\text{H}$ CSP | LOGSY factor | $^1\text{H}$ $T_2$ Q. |
| 5_SL2+3 <sup>ext</sup> | 12.0             | 2.0          | 15%                   | 8.0              | 1.1          | 68%                   | 3.0              | 6.6          | 31%                   | 11.0             | 6.2          | 91%                   | 7.0              | 5.1          | 35%                   |

Binding criteria:  $^1\text{H}$  CSP  $\geq$  6 Hz; LOGSY factor  $>$  1;  $^1\text{H}$   $T_2$  Q.  $\geq$  20%. Hit identification when 2 of 3 criteria are fulfilled.

**Table 3 SI:  $K_D^{est}$  of the three RNA subconstructs with with the four most promising binder from DRTL-F library.**

|          |                                          | 5_SL1                                                                             | 5_SL2+3 <sup>ext</sup>                                                              | 5_SL4                                                                                 |
|----------|------------------------------------------|-----------------------------------------------------------------------------------|-------------------------------------------------------------------------------------|---------------------------------------------------------------------------------------|
| DRTL A04 | $^1\text{H } K_D^{est} [\mu\text{M}]$    | 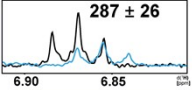 |    |    |
|          | $^{19}\text{F } K_D^{est} [\mu\text{M}]$ |  |    |    |
| DRTL B04 | $^1\text{H } K_D^{est} [\mu\text{M}]$    |                                                                                   |    |    |
|          | $^{19}\text{F } K_D^{est} [\mu\text{M}]$ |                                                                                   |    |    |
| DRTL D04 | $^1\text{H } K_D^{est} [\mu\text{M}]$    |                                                                                   |    |    |
|          | $^{19}\text{F } K_D^{est} [\mu\text{M}]$ |                                                                                   |    |    |
| DRTL A05 | $^1\text{H } K_D^{est} [\mu\text{M}]$    |                                                                                   |   |   |
|          | $^{19}\text{F } K_D^{est} [\mu\text{M}]$ |                                                                                   |  |  |

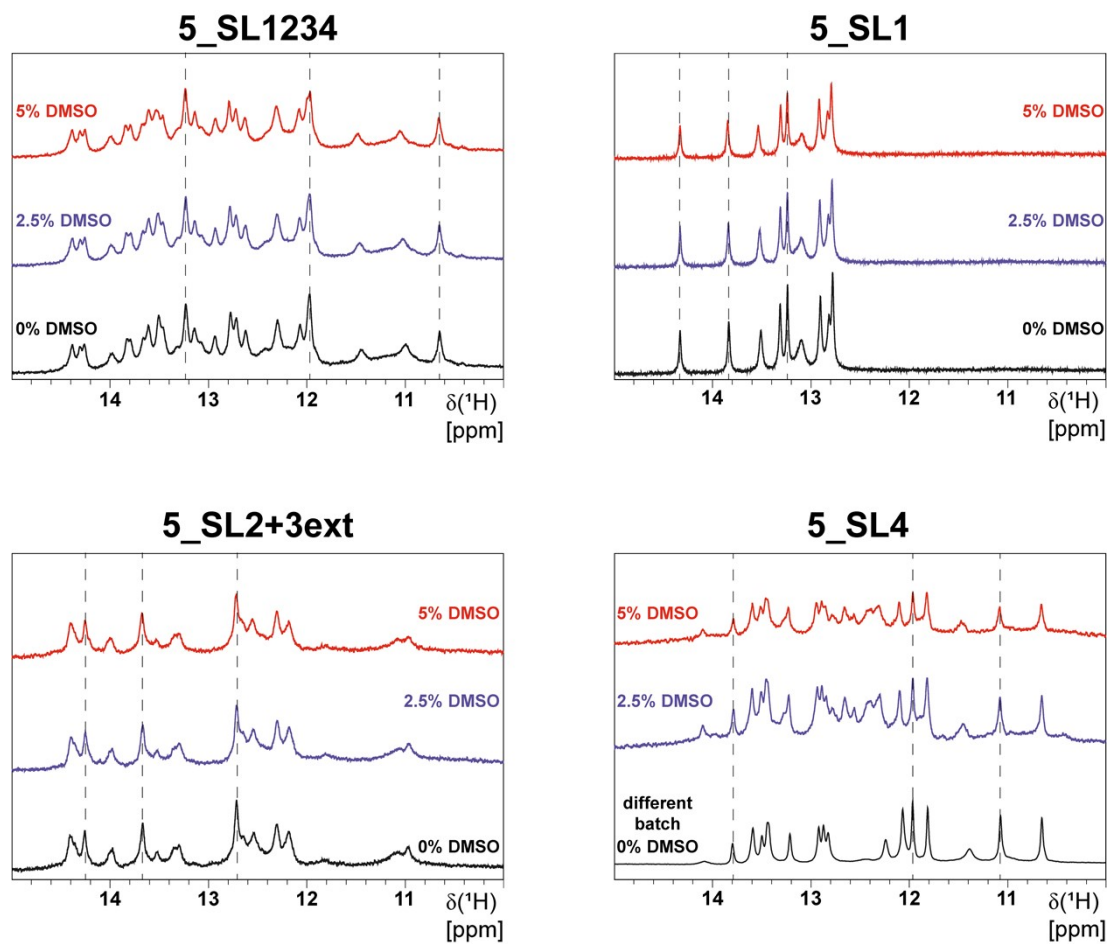

Figure 1: DMSO titrations with all used RNA constructs.

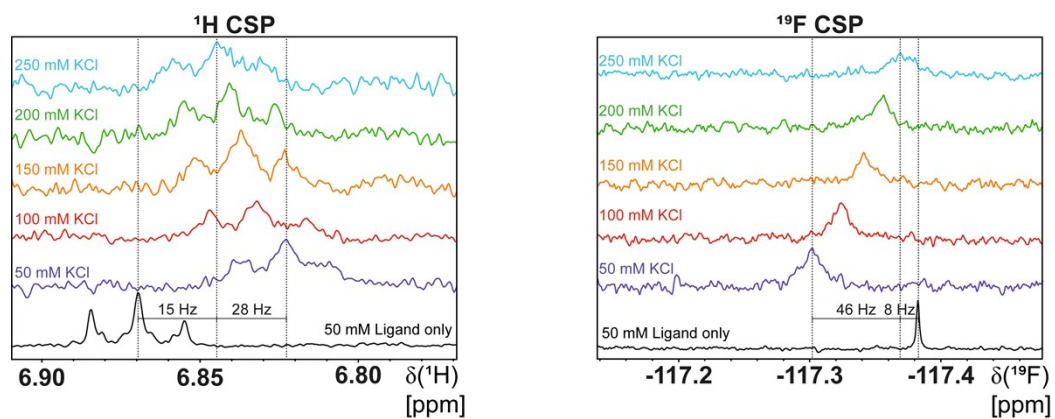

Figure 2: Effect of the salt concentration on the CSP. The spectrum in black shows the measurement of the Ligand DRTL A04 with 50 mM KCl in absence of RNA 5\_SL2+3<sup>ext</sup>. The other spectra represent measurements with increasing salt concentration and a Ligand-RNA ratio of 1:1.

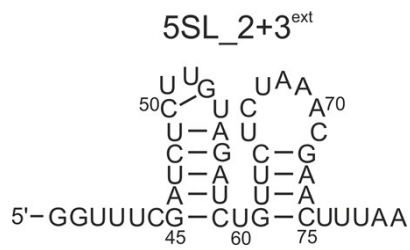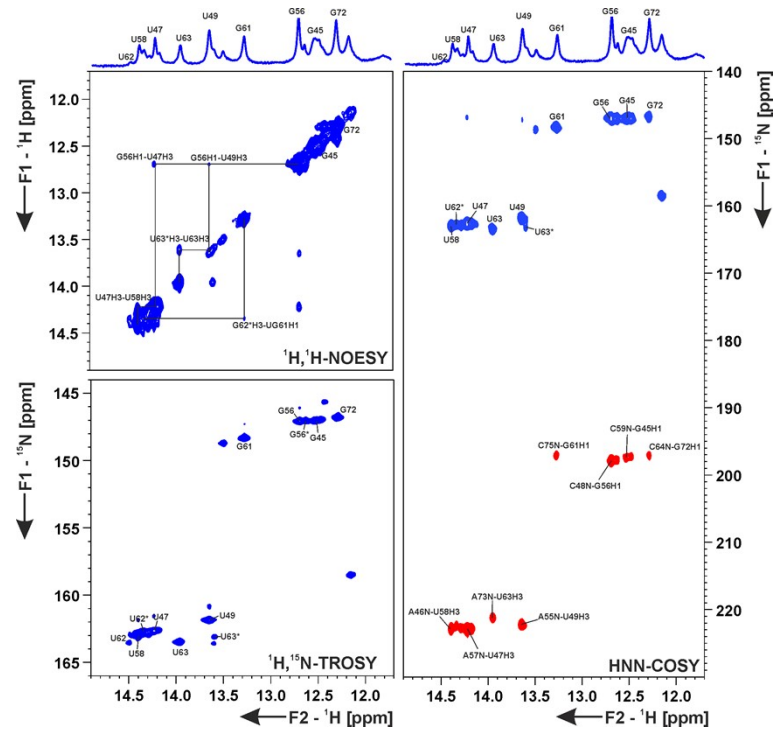

**Figure 3: Secondary structure of 5<sub>SL2</sub>+3<sup>ext</sup> and assignment of the resonances of its imino region using <sup>1</sup>H-<sup>1</sup>H-NOESY, <sup>1</sup>H-<sup>15</sup>N-BEST-TROSY and HNN-COSY experiments. The resonances marked with a star belong to a second confirmation of the RNA sub-element.**
